# Supplementary material for: Dysfunction of EAAT3 Enhances LPS-Induced Postoperative Cognitive Dysfunction
Source: Research Square preprint supplement (doi:10.21203/rs.3.rs-141076/v1), 2021-01-09
Supplement: Supplementary file 1 [file 4a1c254a96f30627dace935b.docx]

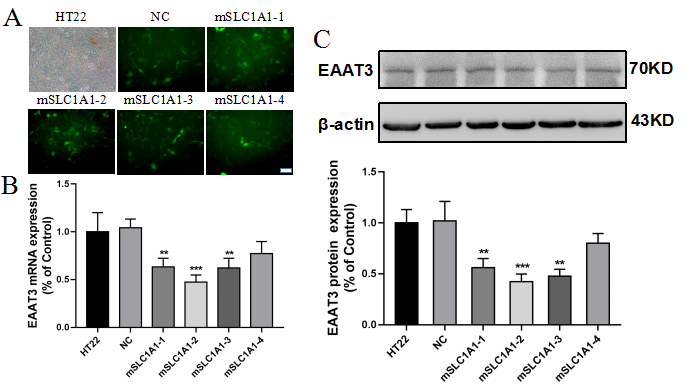


**Suppl. Fig. 1 Screening results of rAAV infecting H22 cell line. (A-C)** Representative images were taken with ×200 fluorescent inverted microscopy 72 hours after transfection (A), and EAAT3 relative expression in cells transfected with different rAAV by mRNA (B) and western blot (C) assays (n=3). **P<0.01, ***P <0.001, vs. HT22. rAAV (recombinant adeno-associated viral); NC(rAAV-shRNA-NC); mSLC1A1-1～4(rAAV-shRNA-SLC1A1-1～4). Bar=50 μm.


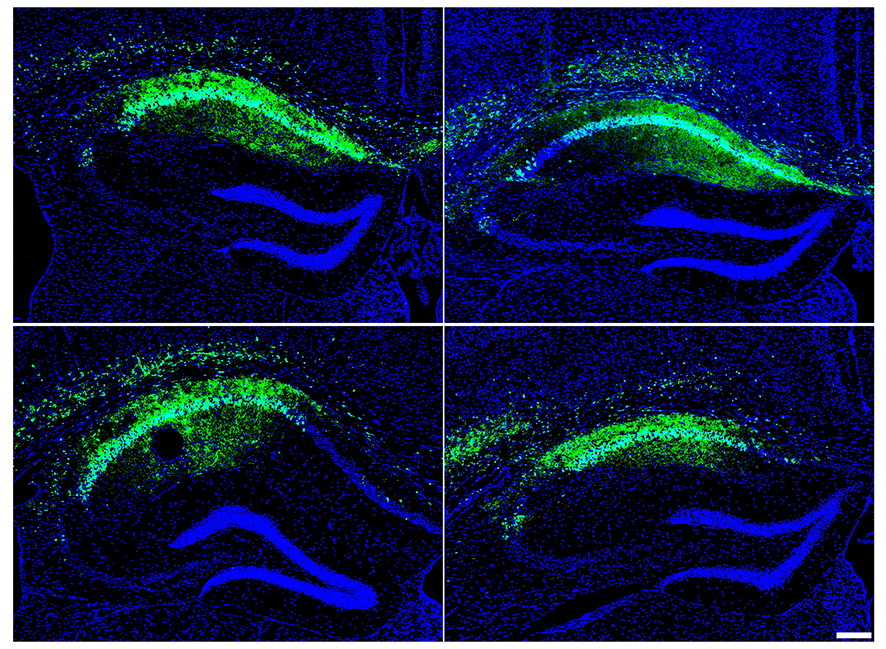


**Suppl. Fig. 2 The rAAV spreads to the entire CA region of the hippocampus 21 days after adult mice receiving the hippocampal injection.** GFP indicates cells in the hippocampus transduced with RNAi. rAAV (recombinant adeno-associated viral); GFP (green fluorescent protein); RNAi (RNA interference vector). Bar=100 μm.
